# Supplementary material for: Another Au32 gold fullerene: a novel spherical cage cluster with octahedral symmetry
Source: Royal Society of Chemistry journal article supplement (doi:10.1039/d5ra09961g), 2026-03-31
Supplement: d5ra09961g1.pdf [file d5ra09961g1.pdf]

# The other Au<sub>32</sub> gold fullerene: a spherical cage cluster with octahedral symmetry

Jiayu Li<sup>1</sup>, Silei Wang<sup>1</sup>, Jing Tian<sup>1</sup>, Xiaoxia Yang<sup>1</sup>, Xiaxi Lei<sup>1</sup>, Lengzhang Xu<sup>1</sup>, Wenwu Xu<sup>1</sup> and Xiao Gu<sup>1\*</sup>

<sup>1</sup> School of Physical Science and Technology, Ningbo University, Ningbo 315211, China

*Email: guxiao@nbu.edu.cn*

## Supporting Information

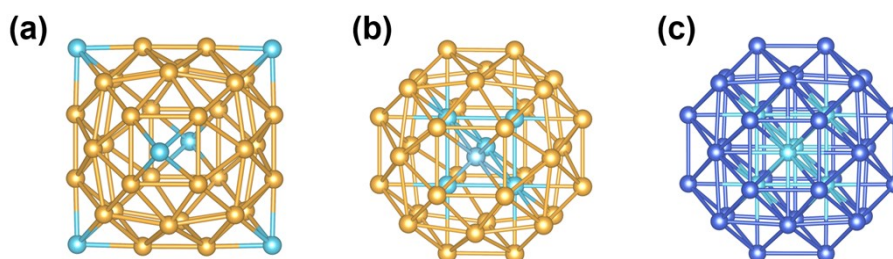

**Figure S1.** Structural models of Au<sub>38</sub> and Cu<sub>38</sub> clusters. (a) The Au<sub>38</sub> cluster (derived from the O<sub>h</sub>-Au<sub>32</sub>) with six additional Au atoms located outside the cage-like structure; (b) The Au<sub>38</sub> cluster with the six additional Au atoms situated inside the cage-like structure; (c) The Cu<sub>38</sub> cluster.

**Table S1.** The properties of the eight Au<sub>32</sub><sup>1-</sup> anionic isomers corresponding to the neutral structures shown in Figure 1.

| <b>Isomer</b> | <b>Symmetry</b>      | <b>Total energy (eV)</b> | <b>HOMO-LUMO Gap (eV)</b> |
|---------------|----------------------|--------------------------|---------------------------|
| <b>I</b>      | <i>I<sub>h</sub></i> | -95.32                   | 1.55                      |
| <b>II</b>     | <i>O<sub>h</sub></i> | -94.87                   | 1.54                      |
| <b>III</b>    | <i>C<sub>1</sub></i> | -94.78                   | -                         |
| <b>IV</b>     | <i>C<sub>1</sub></i> | -94.79                   | -                         |
| <b>V</b>      | <i>C<sub>1</sub></i> | -94.88                   | -                         |
| <b>VI</b>     | <i>C<sub>1</sub></i> | -96.09                   | -                         |
| <b>VII</b>    | <i>C<sub>1</sub></i> | -96.90                   | -                         |
| <b>VIII</b>   | <i>C<sub>1</sub></i> | -97.07                   | -                         |

**Table S2.** The properties of the eight Au<sub>32</sub><sup>2-</sup> anionic isomers corresponding to the neutral structures shown in Figure 1.

| <b>Isomer</b> | <b>Symmetry</b>      | <b>Total energy (eV)</b> | <b>HOMO-LUMO Gap (eV)</b> |
|---------------|----------------------|--------------------------|---------------------------|
| <b>I</b>      | <i>I<sub>h</sub></i> | -97.67                   | 1.57                      |
| <b>II</b>     | <i>O<sub>h</sub></i> | -97.37                   | 1.51                      |
| <b>III</b>    | <i>C<sub>1</sub></i> | -97.86                   | 0.43                      |
| <b>IV</b>     | <i>C<sub>1</sub></i> | -97.77                   | 0.35                      |
| <b>V</b>      | <i>C<sub>1</sub></i> | -97.83                   | 0.28                      |
| <b>VI</b>     | <i>C<sub>1</sub></i> | -99.06                   | 0.38                      |
| <b>VII</b>    | <i>C<sub>1</sub></i> | -100.18                  | 1.01                      |
| <b>VIII</b>   | <i>C<sub>1</sub></i> | -100.26                  | 0.94                      |

**Table S3.** The properties of the eight Au<sub>32</sub><sup>1+</sup> cationic isomers corresponding to the neutral structures shown in Figure 1.

| <b>Isomer</b> | <b>Symmetry</b>      | <b>Total energy (eV)</b> | <b>HOMO-LUMO Gap (eV)</b> |
|---------------|----------------------|--------------------------|---------------------------|
| <b>I</b>      | <i>I<sub>h</sub></i> | -85.91                   | -                         |
| <b>II</b>     | <i>O<sub>h</sub></i> | -84.90                   | -                         |
| <b>III</b>    | <i>C<sub>1</sub></i> | -85.67                   | -                         |
| <b>IV</b>     | <i>C<sub>1</sub></i> | -85.23                   | -                         |
| <b>V</b>      | <i>C<sub>1</sub></i> | -85.48                   | -                         |
| <b>VI</b>     | <i>C<sub>1</sub></i> | -86.69                   | -                         |
| <b>VII</b>    | <i>C<sub>1</sub></i> | -86.85                   | -                         |
| <b>VIII</b>   | <i>C<sub>1</sub></i> | -87.00                   | -                         |

**Table S4.** The properties of the eight Au<sub>32</sub><sup>2+</sup> cationic isomers corresponding to the neutral structures shown in Figure 1.

| <b>Isomer</b> | <b>Symmetry</b>      | <b>Total energy (eV)</b> | <b>HOMO-LUMO Gap (eV)</b> |
|---------------|----------------------|--------------------------|---------------------------|
| <b>I</b>      | <i>I<sub>h</sub></i> | -78.84                   | 1.53                      |
| <b>II</b>     | <i>O<sub>h</sub></i> | -78.68                   | 1.66                      |
| <b>III</b>    | <i>C<sub>1</sub></i> | -79.15                   | 0.43                      |
| <b>IV</b>     | <i>C<sub>1</sub></i> | -78.86                   | 0.44                      |
| <b>V</b>      | <i>C<sub>1</sub></i> | -79.18                   | 0.29                      |
| <b>VI</b>     | <i>C<sub>1</sub></i> | -80.32                   | 0.39                      |
| <b>VII</b>    | <i>C<sub>1</sub></i> | -80.06                   | 0.19                      |
| <b>VIII</b>   | <i>C<sub>1</sub></i> | -80.17                   | 0.21                      |

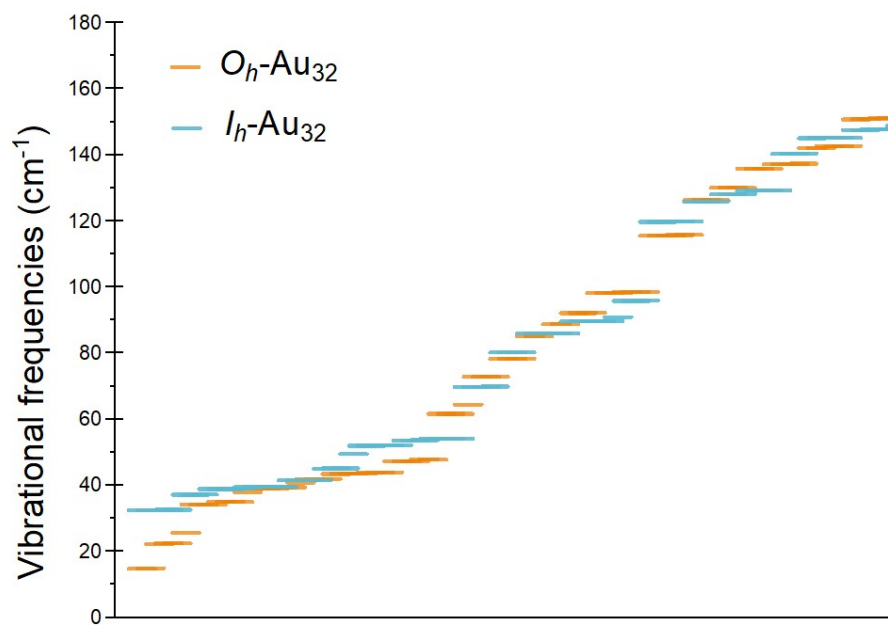

Figure S2. Vibrational frequencies of  $I_h$ -Au<sub>32</sub> and  $O_h$ -Au<sub>32</sub>

**Table S5.** The vibrational frequencies (in  $\text{cm}^{-1}$ ) for all the 90 normal modes of the symmetric neutral and ionic  $\text{Au}_{32}$  species calculated.

| Modes | $\text{Au}_{32}\text{-I } (I_h)$ |                       |                    |                       |                       | $\text{Au}_{32}\text{-II } (O_h)$ |                       |                    |                       |                       |
|-------|----------------------------------|-----------------------|--------------------|-----------------------|-----------------------|-----------------------------------|-----------------------|--------------------|-----------------------|-----------------------|
|       | $\text{Au}_{32}^{2+}$            | $\text{Au}_{32}^{1+}$ | $\text{Au}_{32}^0$ | $\text{Au}_{32}^{1-}$ | $\text{Au}_{32}^{2-}$ | $\text{Au}_{32}^{2+}$             | $\text{Au}_{32}^{1+}$ | $\text{Au}_{32}^0$ | $\text{Au}_{32}^{1-}$ | $\text{Au}_{32}^{2-}$ |
| 1     | 31.71                            | 33.48                 | 32.49              | 32.75                 | 31.29                 | 17.18                             | 17.40                 | 14.76              | 17.67                 | 19.21                 |
| 2     | 31.74                            | 33.53                 | 32.51              | 32.77                 | 31.34                 | 17.39                             | 17.49                 | 14.92              | 17.69                 | 19.25                 |
| 3     | 31.76                            | 33.55                 | 32.56              | 32.80                 | 31.36                 | 24.28                             | 24.64                 | 22.32              | 24.79                 | 25.39                 |
| 4     | 33.25                            | 33.59                 | 32.61              | 32.85                 | 31.41                 | 24.46                             | 24.67                 | 22.44              | 24.83                 | 25.40                 |
| 5     | 33.27                            | 33.61                 | 32.64              | 32.89                 | 31.47                 | 24.49                             | 24.69                 | 22.46              | 24.85                 | 25.44                 |
| 6     | 33.31                            | 33.63                 | 37.17              | 36.65                 | 36.15                 | 27.08                             | 27.61                 | 25.73              | 28.22                 | 27.60                 |
| 7     | 33.31                            | 33.66                 | 37.18              | 36.67                 | 36.20                 | 34.68                             | 34.87                 | 34.16              | 32.95                 | 34.53                 |
| 8     | 33.34                            | 33.69                 | 37.23              | 36.71                 | 36.27                 | 34.71                             | 34.90                 | 34.18              | 33.01                 | 34.54                 |
| 9     | 36.37                            | 37.79                 | 38.85              | 38.58                 | 37.05                 | 34.72                             | 34.91                 | 34.20              | 33.03                 | 34.55                 |
| 10    | 36.42                            | 37.83                 | 38.90              | 38.63                 | 37.11                 | 36.98                             | 37.30                 | 34.98              | 34.59                 | 34.92                 |
| 11    | 36.44                            | 37.86                 | 38.93              | 38.65                 | 37.23                 | 37.00                             | 37.33                 | 34.99              | 34.60                 | 35.00                 |
| 12    | 36.46                            | 37.91                 | 39.01              | 38.72                 | 37.26                 | 37.05                             | 37.34                 | 35.01              | 34.65                 | 35.02                 |
| 13    | 36.52                            | 37.96                 | 39.44              | 39.91                 | 37.26                 | 38.15                             | 37.52                 | 37.99              | 34.96                 | 36.70                 |
| 14    | 36.53                            | 37.99                 | 39.50              | 40.00                 | 37.55                 | 38.63                             | 37.58                 | 39.00              | 38.67                 | 38.15                 |
| 15    | 36.56                            | 38.02                 | 39.55              | 40.03                 | 37.61                 | 38.63                             | 37.58                 | 39.01              | 38.79                 | 38.16                 |
| 16    | 36.57                            | 38.05                 | 39.57              | 40.07                 | 37.66                 | 38.65                             | 39.12                 | 39.04              | 39.03                 | 38.18                 |
| 17    | 42.28                            | 42.31                 | 39.61              | 40.11                 | 37.70                 | 41.79                             | 40.81                 | 39.42              | 39.08                 | 39.70                 |
| 18    | 42.30                            | 42.37                 | 41.53              | 40.91                 | 38.02                 | 42.06                             | 41.35                 | 39.46              | 39.09                 | 39.78                 |
| 19    | 42.34                            | 42.41                 | 41.56              | 40.95                 | 38.04                 | 42.09                             | 41.39                 | 40.88              | 41.69                 | 40.28                 |
| 20    | 42.37                            | 42.42                 | 41.56              | 40.95                 | 38.07                 | 42.13                             | 42.10                 | 41.88              | 42.07                 | 42.61                 |
| 21    | 42.38                            | 42.44                 | 41.63              | 41.01                 | 40.32                 | 42.15                             | 42.42                 | 41.95              | 42.09                 | 42.62                 |
| 22    | 61.84                            | 56.38                 | 45.09              | 44.03                 | 42.77                 | 42.15                             | 42.47                 | 41.96              | 42.17                 | 42.62                 |
| 23    | 61.85                            | 56.39                 | 45.13              | 44.06                 | 42.83                 | 42.66                             | 42.49                 | 43.41              | 42.62                 | 42.68                 |
| 24    | 61.89                            | 56.43                 | 45.16              | 44.11                 | 42.83                 | 44.06                             | 43.67                 | 43.55              | 42.64                 | 42.68                 |
| 25    | 62.54                            | 60.75                 | 49.47              | 48.49                 | 42.87                 | 44.07                             | 43.68                 | 43.57              | 42.69                 | 42.73                 |
| 26    | 62.54                            | 60.77                 | 51.99              | 51.51                 | 45.23                 | 44.14                             | 43.73                 | 43.58              | 43.30                 | 42.74                 |
| 27    | 62.56                            | 60.77                 | 52.01              | 51.61                 | 45.27                 | 47.75                             | 46.44                 | 43.85              | 43.80                 | 45.02                 |
| 28    | 62.59                            | 60.78                 | 52.04              | 51.61                 | 45.28                 | 47.76                             | 46.50                 | 43.88              | 43.81                 | 45.04                 |
| 29    | 65.80                            | 61.18                 | 52.06              | 51.65                 | 45.38                 | 47.76                             | 46.54                 | 43.90              | 43.88                 | 45.06                 |
| 30    | 65.84                            | 61.48                 | 52.11              | 51.69                 | 45.43                 | 49.51                             | 49.53                 | 47.32              | 46.54                 | 48.02                 |
| 31    | 65.85                            | 61.53                 | 53.56              | 53.37                 | 48.14                 | 49.58                             | 49.53                 | 47.32              | 46.55                 | 48.04                 |
| 32    | 65.89                            | 61.54                 | 53.64              | 53.44                 | 48.25                 | 50.52                             | 49.53                 | 47.33              | 46.55                 | 48.12                 |
| 33    | 65.91                            | 61.56                 | 53.66              | 53.52                 | 48.30                 | 50.53                             | 49.55                 | 47.80              | 48.63                 | 48.58                 |
| 34    | 65.93                            | 61.58                 | 54.04              | 54.63                 | 49.92                 | 50.63                             | 49.61                 | 47.83              | 48.65                 | 48.68                 |
| 35    | 65.97                            | 62.17                 | 54.06              | 54.64                 | 49.94                 | 64.28                             | 64.18                 | 61.62              | 62.41                 | 62.28                 |
| 36    | 66.01                            | 62.20                 | 54.09              | 54.69                 | 49.96                 | 64.36                             | 64.22                 | 61.63              | 62.44                 | 62.49                 |
| 37    | 66.88                            | 62.25                 | 54.09              | 54.72                 | 49.97                 | 64.38                             | 64.23                 | 61.65              | 62.47                 | 62.51                 |
| 38    | 70.17                            | 71.01                 | 69.77              | 71.40                 | 71.20                 | 67.86                             | 67.54                 | 64.45              | 65.04                 | 65.47                 |
| 39    | 70.18                            | 71.02                 | 69.80              | 71.42                 | 71.23                 | 72.19                             | 73.22                 | 72.80              | 74.30                 | 70.07                 |
| 40    | 70.22                            | 71.04                 | 69.81              | 71.44                 | 71.27                 | 72.21                             | 73.24                 | 72.82              | 74.35                 | 70.09                 |
| 41    | 70.25                            | 71.09                 | 69.87              | 71.51                 | 71.39                 | 72.23                             | 73.31                 | 72.85              | 74.37                 | 70.18                 |
| 42    | 71.01                            | 75.68                 | 80.19              | 82.59                 | 84.75                 | 79.57                             | 80.16                 | 78.29              | 80.23                 | 78.71                 |
| 43    | 71.02                            | 75.72                 | 80.21              | 82.64                 | 84.78                 | 79.60                             | 80.17                 | 78.31              | 80.25                 | 78.71                 |
| 44    | 71.04                            | 75.75                 | 80.24              | 82.66                 | 84.83                 | 79.62                             | 80.20                 | 78.36              | 80.29                 | 78.72                 |
| 45    | 81.42                            | 84.39                 | 85.93              | 88.13                 | 88.52                 | 84.42                             | 85.67                 | 85.15              | 87.01                 | 82.37                 |
| 46    | 81.43                            | 84.39                 | 85.98              | 88.16                 | 88.56                 | 84.53                             | 85.72                 | 85.19              | 87.05                 | 82.43                 |
| 47    | 81.44                            | 84.41                 | 85.98              | 88.17                 | 88.61                 | 88.84                             | 88.83                 | 85.94              | 87.93                 | 87.85                 |
| 48    | 81.45                            | 84.43                 | 86.00              | 88.21                 | 88.71                 | 92.99                             | 92.81                 | 88.74              | 91.05                 | 92.51                 |
| 49    | 81.47                            | 84.45                 | 86.01              | 88.24                 | 88.74                 | 93.03                             | 92.82                 | 88.79              | 91.13                 | 92.63                 |

Table S5. Continued.

| Modes | Au <sub>32</sub> -I ( <i>I<sub>h</sub></i> ) |                                |                               |                                |                                | Au <sub>32</sub> -II ( <i>O<sub>h</sub></i> ) |                                |                               |                                |                                |
|-------|----------------------------------------------|--------------------------------|-------------------------------|--------------------------------|--------------------------------|-----------------------------------------------|--------------------------------|-------------------------------|--------------------------------|--------------------------------|
|       | Au <sub>32</sub> <sup>2+</sup>               | Au <sub>32</sub> <sup>1+</sup> | Au <sub>32</sub> <sup>0</sup> | Au <sub>32</sub> <sup>1-</sup> | Au <sub>32</sub> <sup>2-</sup> | Au <sub>32</sub> <sup>2+</sup>                | Au <sub>32</sub> <sup>1+</sup> | Au <sub>32</sub> <sup>0</sup> | Au <sub>32</sub> <sup>1-</sup> | Au <sub>32</sub> <sup>2-</sup> |
| 50    | 86.23                                        | 89.11                          | 89.60                         | 92.15                          | 91.00                          | 93.37                                         | 94.11                          | 92.11                         | 95.08                          | 93.46                          |
| 51    | 86.26                                        | 89.15                          | 89.62                         | 92.17                          | 91.90                          | 93.38                                         | 94.18                          | 92.15                         | 95.15                          | 93.46                          |
| 52    | 86.28                                        | 89.16                          | 89.62                         | 92.22                          | 91.97                          | 93.39                                         | 94.21                          | 92.17                         | 95.15                          | 93.61                          |
| 53    | 86.30                                        | 89.20                          | 89.66                         | 92.24                          | 92.01                          | 101.89                                        | 101.87                         | 98.20                         | 100.51                         | 102.63                         |
| 54    | 86.32                                        | 89.22                          | 89.68                         | 92.26                          | 92.06                          | 101.92                                        | 101.95                         | 98.22                         | 100.52                         | 102.78                         |
| 55    | 90.89                                        | 93.39                          | 90.92                         | 92.76                          | 92.10                          | 101.98                                        | 101.99                         | 98.25                         | 100.53                         | 102.79                         |
| 56    | 90.91                                        | 94.24                          | 95.84                         | 98.11                          | 98.12                          | 103.63                                        | 103.09                         | 98.57                         | 101.01                         | 102.80                         |
| 57    | 90.92                                        | 94.26                          | 95.84                         | 98.12                          | 98.16                          | 103.63                                        | 103.11                         | 98.59                         | 101.10                         | 102.94                         |
| 58    | 92.91                                        | 94.27                          | 95.85                         | 98.12                          | 98.17                          | 103.67                                        | 103.12                         | 98.59                         | 101.11                         | 102.96                         |
| 59    | 115.86                                       | 122.05                         | 119.70                        | 122.48                         | 121.06                         | 118.95                                        | 119.08                         | 115.49                        | 118.10                         | 117.58                         |
| 60    | 115.92                                       | 122.12                         | 119.71                        | 122.48                         | 121.09                         | 118.95                                        | 119.14                         | 115.49                        | 118.11                         | 117.58                         |
| 61    | 115.92                                       | 122.14                         | 119.76                        | 122.53                         | 121.10                         | 118.96                                        | 119.17                         | 115.50                        | 118.13                         | 117.62                         |
| 62    | 122.28                                       | 122.73                         | 119.77                        | 122.57                         | 121.11                         | 121.39                                        | 120.92                         | 115.78                        | 118.26                         | 121.51                         |
| 63    | 122.28                                       | 122.76                         | 119.80                        | 122.57                         | 121.13                         | 121.58                                        | 120.96                         | 115.80                        | 118.26                         | 121.55                         |
| 64    | 122.34                                       | 122.77                         | 125.85                        | 129.50                         | 130.74                         | 129.23                                        | 130.35                         | 126.25                        | 130.19                         | 131.70                         |
| 65    | 122.62                                       | 122.78                         | 125.87                        | 129.53                         | 130.77                         | 129.31                                        | 130.35                         | 126.29                        | 130.22                         | 131.73                         |
| 66    | 122.62                                       | 122.82                         | 125.94                        | 129.54                         | 130.79                         | 129.64                                        | 130.36                         | 126.29                        | 130.25                         | 131.80                         |
| 67    | 122.64                                       | 124.92                         | 128.07                        | 132.13                         | 133.58                         | 132.80                                        | 133.61                         | 130.01                        | 134.02                         | 134.16                         |
| 68    | 122.68                                       | 124.94                         | 128.19                        | 132.18                         | 133.60                         | 132.84                                        | 133.65                         | 130.01                        | 134.06                         | 134.18                         |
| 69    | 122.69                                       | 125.03                         | 128.20                        | 132.22                         | 133.63                         | 132.86                                        | 133.69                         | 130.02                        | 134.09                         | 134.27                         |
| 70    | 128.38                                       | 129.70                         | 129.14                        | 132.72                         | 133.64                         | 138.09                                        | 139.60                         | 135.78                        | 138.07                         | 134.29                         |
| 71    | 128.39                                       | 129.72                         | 129.21                        | 132.76                         | 135.67                         | 138.10                                        | 139.64                         | 135.78                        | 138.12                         | 134.31                         |
| 72    | 128.42                                       | 129.73                         | 129.24                        | 132.77                         | 135.70                         | 138.14                                        | 139.67                         | 135.79                        | 138.15                         | 134.41                         |
| 73    | 128.44                                       | 129.75                         | 129.25                        | 132.80                         | 135.71                         | 140.27                                        | 139.99                         | 137.19                        | 142.03                         | 139.78                         |
| 74    | 150.87                                       | 149.78                         | 140.32                        | 143.18                         | 137.63                         | 140.32                                        | 140.03                         | 137.19                        | 142.09                         | 139.94                         |
| 75    | 150.90                                       | 149.85                         | 140.41                        | 143.28                         | 137.74                         | 140.34                                        | 140.04                         | 137.22                        | 142.10                         | 139.97                         |
| 76    | 150.91                                       | 149.90                         | 140.47                        | 143.37                         | 137.82                         | 140.72                                        | 141.48                         | 137.34                        | 142.52                         | 142.15                         |
| 77    | 150.94                                       | 151.14                         | 145.04                        | 148.22                         | 144.74                         | 144.63                                        | 145.32                         | 142.05                        | 145.52                         | 142.25                         |
| 78    | 151.34                                       | 151.21                         | 145.06                        | 148.26                         | 144.77                         | 144.65                                        | 145.33                         | 142.07                        | 145.54                         | 143.76                         |
| 79    | 151.44                                       | 151.27                         | 145.07                        | 148.28                         | 144.79                         | 149.17                                        | 148.68                         | 142.65                        | 145.56                         | 147.16                         |
| 80    | 151.49                                       | 151.28                         | 145.11                        | 148.32                         | 144.82                         | 149.17                                        | 148.73                         | 142.65                        | 145.58                         | 147.19                         |
| 81    | 151.54                                       | 151.32                         | 145.16                        | 148.39                         | 144.87                         | 149.24                                        | 148.74                         | 142.68                        | 145.59                         | 147.28                         |
| 82    | 151.56                                       | 151.40                         | 147.52                        | 151.40                         | 150.77                         | 150.54                                        | 152.74                         | 150.75                        | 155.02                         | 151.93                         |
| 83    | 152.35                                       | 151.41                         | 147.58                        | 151.46                         | 150.84                         | 153.43                                        | 154.37                         | 150.76                        | 155.05                         | 152.64                         |
| 84    | 152.43                                       | 151.44                         | 147.66                        | 151.56                         | 150.91                         | 153.49                                        | 154.38                         | 150.79                        | 155.21                         | 152.66                         |
| 85    | 152.49                                       | 151.46                         | 147.70                        | 151.59                         | 150.94                         | 153.56                                        | 154.39                         | 151.17                        | 155.23                         | 152.70                         |
| 86    | 155.11                                       | 152.91                         | 147.72                        | 151.62                         | 150.95                         | 157.26                                        | 157.23                         | 151.18                        | 155.26                         | 156.51                         |
| 87    | 155.12                                       | 152.93                         | 148.82                        | 152.66                         | 152.30                         | 157.48                                        | 157.27                         | 151.25                        | 156.62                         | 156.69                         |
| 88    | 155.15                                       | 152.94                         | 148.84                        | 152.69                         | 152.34                         | 158.15                                        | 158.40                         | 153.22                        | 157.03                         | 157.33                         |
| 89    | 155.19                                       | 152.98                         | 148.86                        | 152.70                         | 152.36                         | 158.42                                        | 158.43                         | 153.23                        | 157.04                         | 157.49                         |
| 90    | 155.22                                       | 153.00                         | 148.87                        | 152.72                         | 152.39                         | 158.44                                        | 158.47                         | 153.24                        | 157.09                         | 157.50                         |

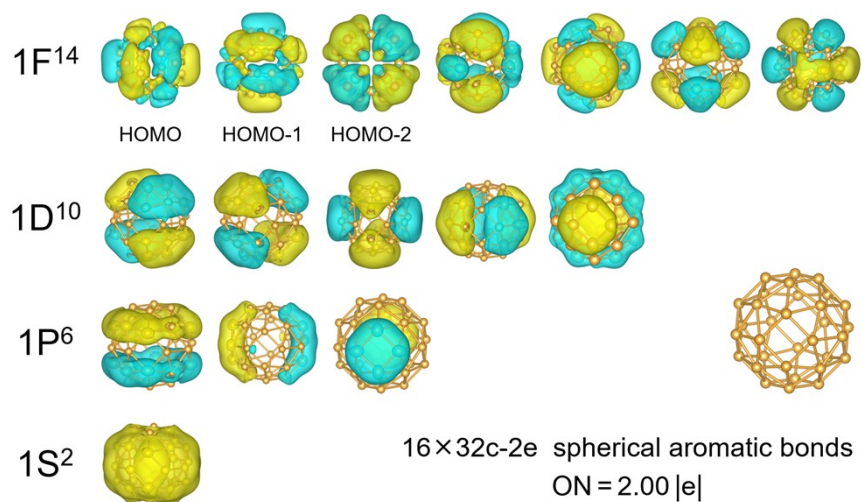

Figure S3. Chemical bonding pattern for  $O_h$ -Au<sub>32</sub>, as shown by the AdNDP analysis. ON stands for occupation number.
